# Supplementary material for: Synergistic effect of spatially isolated Ni2P and NiO redox cocatalysts on g-C3N4 for sustainably boosted CO2 photocatalytic reduction
Source: Royal Society of Chemistry journal article supplement (doi:10.1039/d2ta03095k), 2022-01-01
Supplement: d2ta03095k1.pdf [file d2ta03095k1.pdf]

## Supplementary Information

# Synergistic effect of spatially isolated Ni<sub>2</sub>P and NiO redox cocatalysts on g-C<sub>3</sub>N<sub>4</sub> for sustainably efficient CO<sub>2</sub> photocatalytic reduction

Qian Li <sup>a,b</sup>, Wenji Feng <sup>a</sup>, Yiqiu Liu <sup>a,c</sup>, Dongzhi Chen <sup>b</sup>, Zhongbiao Wu <sup>a,c</sup>, Haiqiang Wang <sup>a,c\*</sup>

<sup>a</sup> Key Laboratory of Environment Remediation and Ecological Health, Ministry of Education, College of Environmental & Resources Science, Zhejiang University, Hangzhou 310058, P.R. China

<sup>b</sup> Department of Environmental Science and Engineering, School of Petrochemical Engineering & Environment, Zhejiang Ocean University, Zhoushan, 316022, P. R. China

<sup>c</sup> Zhejiang Provincial Engineering Research Center of Industrial Boiler & Furnace Flue Gas Pollution Control, Hangzhou, 311202, P. R. China

<sup>d</sup> Zhejiang Provincial Key Laboratory of Petrochemical Pollution Control, Zhoushan, 316004, P. R. China

### 1. Experiments

#### (1) Batch experiments of CO<sub>2</sub> photocatalytic reduction

0.05 g photocatalysts were coated on a 2.5 × 2.5 cm<sup>2</sup> glass film, and 10 mL deionized water were added in the middle of the reactor. The reactor was then vacuumed and filled with pure CO<sub>2</sub> at ambient pressure, and such operation was repeated three times. The reactor was

---

\* Corresponding author:

(H. Wang) E-mail: [haiqiangwang@zju.edu.cn](mailto:haiqiangwang@zju.edu.cn); Tel. / Fax: +86-571-87953088.

Full postal address: Key Laboratory of Environment Remediation and Ecological Health, Ministry of Education, College of Environmental & Resources Science, Zhejiang University, Hangzhou, 310058, P.R. China.

irradiated by a 300 W Xe lamp with a 420-nm cutoff filter for 4 h, then the gas products were evaluated with an Agilent 7890B gas chromatography (USA) equipped with a TCD detector connected to a Molecular Sieve 5A column, with He used as the carrier gas.

## (2) Photodeposition experiments

0.1 g  $\text{Ni}_2\text{P}/\text{NiO}/\text{CN}(0.25)$  were dispersed in 40 mL deionized water in a semi-closed glass container, after fully mixed for 10 min, 2 mL  $\text{AgNO}_3$  (10 mM) and 2 mL  $\text{Mn}(\text{NO}_3)_2$  solution (10 mM) were added. After  $\text{N}_2$  purged for 15 min, the suspension was irradiated by a 300 W Xe lamp with a 420 nm cutoff filter for 3 h, during which  $\text{N}_2$  was always purged to maintain an inert atmosphere. The filtrates were then adequately washed with deionized water, dried in a vacuum oven at  $60^\circ\text{C}$ .

## 2. Figures and charts

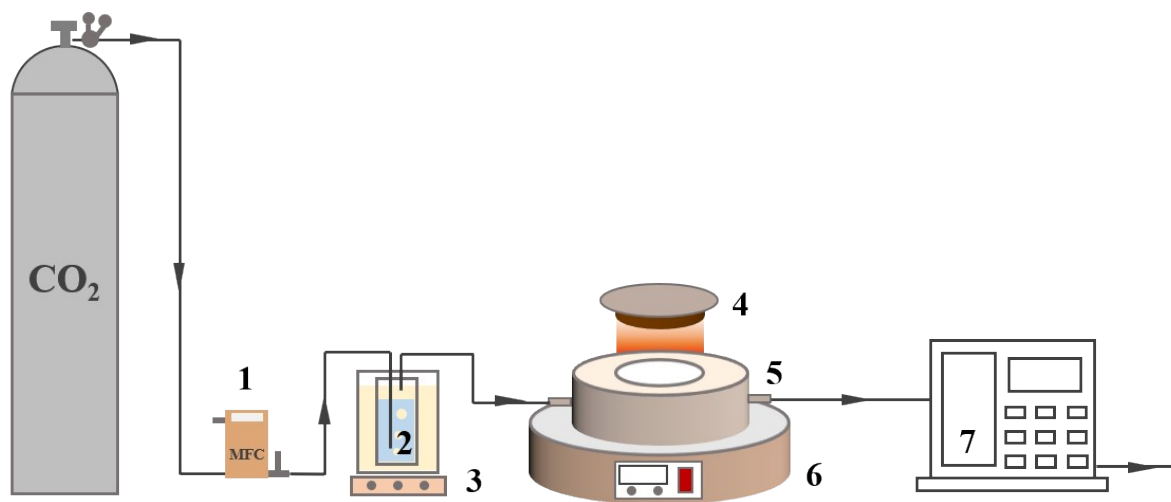

Figure S1. Schematic diagram of  $\text{CO}_2$  photocatalytic reduction system (1-mass controller, 2-water bubbler, 3-temperature controller for the water bubbler, 4-Xeon light, 5-photocatalytic reactor, 6-temperature controller for the photocatalytic reactor, 7-gas chromatography).

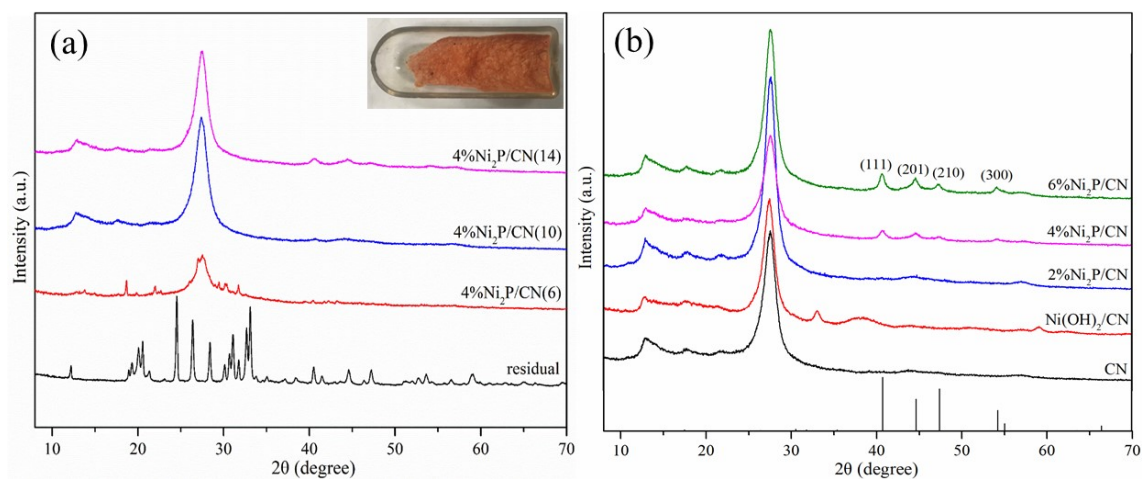

Figure S2. XRD patterns of 4%Ni<sub>2</sub>P/CN(*x*) (the insert was the image of the residuals of Na<sub>2</sub>HPO<sub>4</sub>·H<sub>2</sub>O after calcination) (a) and *x*Ni<sub>2</sub>P/CN samples (b).

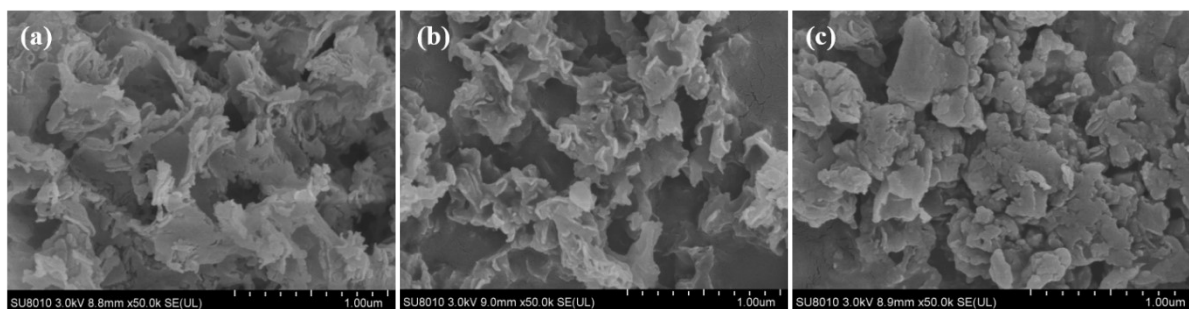

Figure S3 SEM images of CN (a), Ni(OH)<sub>2</sub>/CN (b), Ni<sub>2</sub>P/NiO/CN(1).

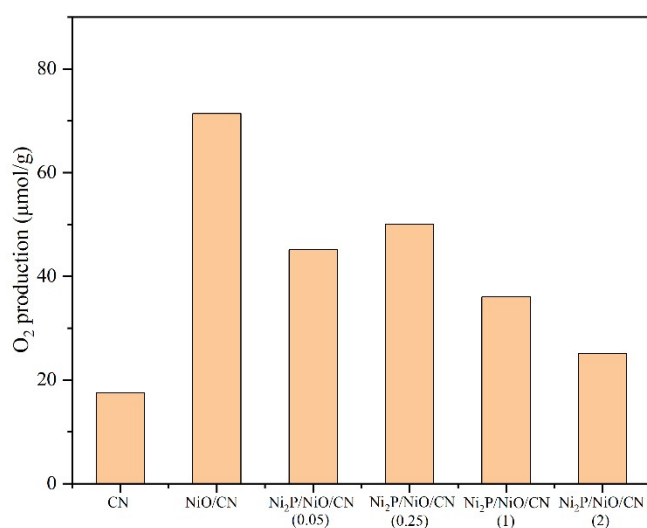

Figure S4. O<sub>2</sub> evolution over CN, NiO/CN, and Ni<sub>2</sub>P/NiO/CN(MR) under visible-light irradiation for 4 h in batch experiments.

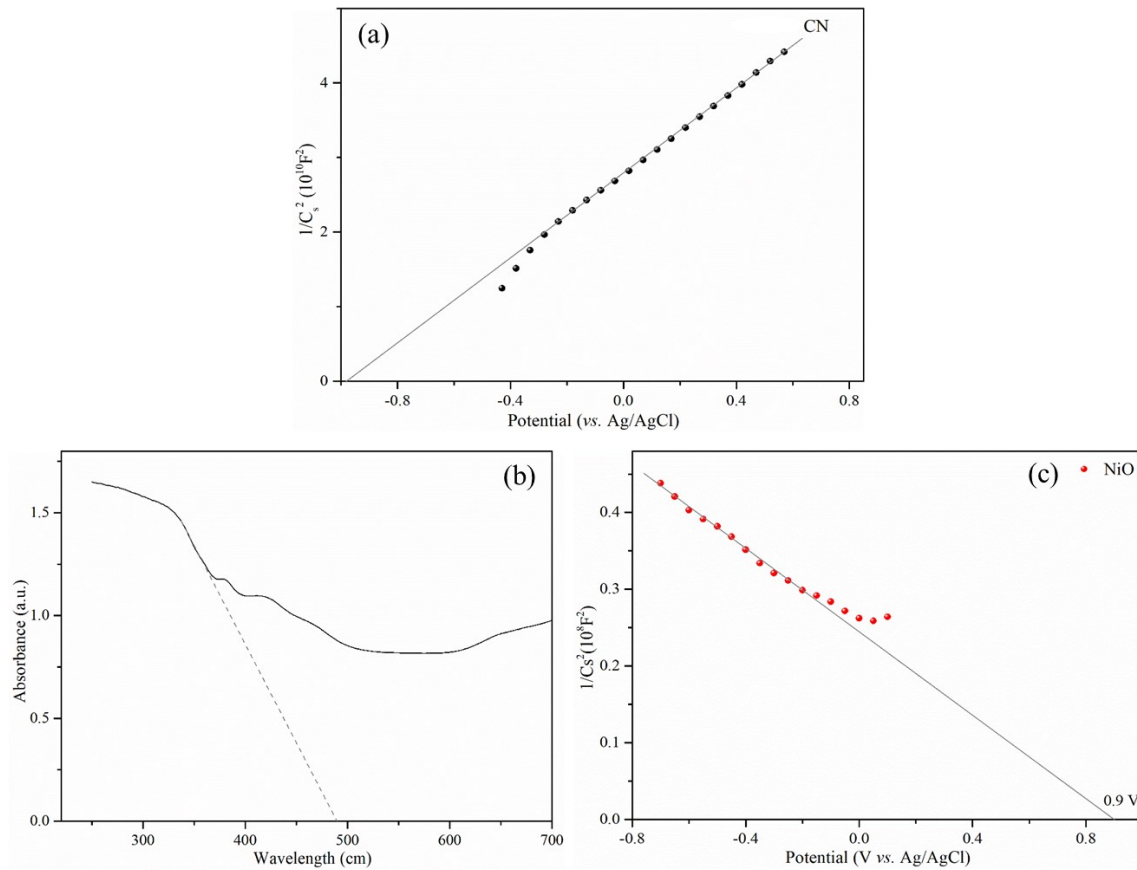

Figure S5. MS curves of CN (a), UV-vis spectra (b) and MS curve (c) of NiO.

Table S1. BET surface area ( $S_{\text{BET}}$ ), average pore volume and pore size of CN, NiO and  $\text{Ni}_2\text{P}/\text{NiO}/\text{CN}(\text{MR})$  samples.

| Sample                                            | $S_{\text{BET}}$<br>( $\text{m}^2/\text{g}$ ) | Average Pore<br>Size (nm) | Pore Volume<br>( $\text{cm}^3/\text{g}$ ) |
|---------------------------------------------------|-----------------------------------------------|---------------------------|-------------------------------------------|
| CN                                                | 59.70                                         | 7.30                      | 0.186                                     |
| NiO/CN                                            | 66.45                                         | 6.90                      | 0.234                                     |
| $\text{Ni}_2\text{P}/\text{NiO}/\text{CN}(0.05)$  | 61.21                                         | 8.05                      | 0.249                                     |
| $\text{Ni}_2\text{P}/\text{NiO}/\text{CN}(0.125)$ | 54.76                                         | 8.04                      | 0.243                                     |
| $\text{Ni}_2\text{P}/\text{NiO}/\text{CN}(0.25)$  | 46.73                                         | 7.99                      | 0.238                                     |
| $\text{Ni}_2\text{P}/\text{NiO}/\text{CN}(1)$     | 46.68                                         | 7.86                      | 0.223                                     |
